# Supplementary material for: Topologically protected surface states in a centrosymmetric superconductor β-PdBi2
Source: PubMed Central journal article supplement (PMC4633943; doi:10.1038/ncomms9595), 2015-10-13
Supplement: ncomms9595-s1.pdf [file ncomms9595-s1.pdf]

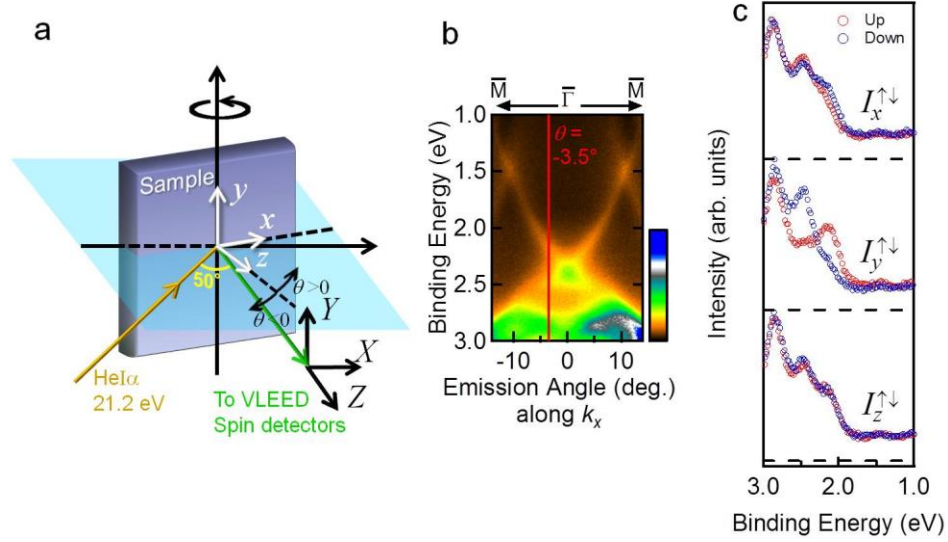

### Supplementary Figure 1: Spin polarization of surface Dirac-cone band

**a**, Schematic of spin- and angular-resolved photoemission spectroscopy (SARPES) experimental geometry using the HeI $\alpha$  light source (21.2 eV) and very low energy electron diffraction (VLEED) spin detectors. **b**, Angular-resolved photoemission (ARPES) image plotted as functions of the emission angle  $\theta$  and the binding energy, showing the surface Dirac-cone. **c**, Spin-resolved energy distribution curves recorded at  $\theta = -3.5^\circ$  for  $x$ ,  $y$ ,  $z$  spin orientations, respectively. Red (blue) markers indicate the intensities for spin-up (spin-down) components,  $I_x^\uparrow$  ( $I_x^\downarrow$ ),  $I_y^\uparrow$  ( $I_y^\downarrow$ ), and  $I_z^\uparrow$  ( $I_z^\downarrow$ ).

### Supplementary Note 1. Spin- and angular- resolved photoemission spectroscopy (SARPES)

SARPES with the HeI $\alpha$  light source (21.2 eV) was performed at the Efficient SPin REsolved SpectroScOpy (ESPRESSO) end station attached to the APPLE-II type variable polarization undulator beam line (BL-9B) at the Hiroshima Synchrotron Radiation Center (HSRC)<sup>1</sup>. The analyzer of this system consists of 2 sets of VLEED (Very low energy electron diffraction) spin detectors, thus enabling the detection of the electron spin orientation in 3 dimension<sup>2</sup>. The angular resolution was set to  $\pm 1.5^\circ$  and the total energy resolution was set to 35 meV. Samples were cleaved *in situ* at around room temperature and measured at 20 K.

The geometry of the measurement is shown in Supplementary Figure 1a. Here,  $x, y, z$  represent the axes fixed at the  $\beta$ -PdBi<sub>2</sub> sample, where  $x$  and  $y$  are taken along the in-plane nearest Pd-Pd directions and  $z$  along the stacking direction.  $X, Y, Z$  are the coordinate system fixed at the spin detector system. The magnetization of the targets in the two VLEED spin detectors can be selectively aligned along  $X, Z$ , and  $Y, Z$ , respectively, by using electric coils. The acquisition of the spin polarization along the  $\beta$ -PdBi<sub>2</sub> crystal axes,  $x, y, z$ , is available by the following procedures.

The spin polarization of the electron at the spin detector, e.g.  $P_Y$  for  $Y$ -direction, is obtained by

$$P_Y = \frac{1}{S_{eff}} \frac{I_Y^+ - I_Y^-}{I_Y^+ + I_Y^-}, \text{ where } S_{eff} = 0.32 \text{ is the effective Sherman function and } I_Y^+, I_Y^- \text{ are the raw ARPES}$$

spectra recorded with the target magnetization of plus and minus along  $Y$ -direction.  $P_X$  and  $P_Z$  are

similarly obtained from  $I_X^{+,-}$  and  $I_Z^{+,-}$ , respectively. The spin-up and spin-down spectra,  $I_X^{\uparrow,\downarrow}$ ,  $I_Y^{\uparrow,\downarrow}$ ,

$I_Z^{\uparrow,\downarrow}$ , are calculated by  $I_Y^{\uparrow,\downarrow} = (1 \pm P_Y) \frac{I_Y^+ + I_Y^-}{2}$ , and etc.

The spin polarization  $P_x, P_y, P_z$  and the SARPES spectra  $I_x^{\uparrow,\downarrow}$ ,  $I_y^{\uparrow,\downarrow}$ ,  $I_z^{\uparrow,\downarrow}$  projected along the  $x, y, z$  crystal axes are related to  $P_X, P_Y, P_Z$  and  $I_X^{\uparrow,\downarrow}$ ,  $I_Y^{\uparrow,\downarrow}, I_Z^{\uparrow,\downarrow}$  by

$$\begin{pmatrix} P_x \\ P_y \\ P_z \end{pmatrix} = \begin{pmatrix} \cos \theta & 0 & -\sin \theta \\ 0 & 1 & 0 \\ \sin \theta & 0 & \cos \theta \end{pmatrix} \begin{pmatrix} P_X \\ P_Y \\ P_Z \end{pmatrix}, \quad \begin{pmatrix} I_x^{\uparrow,\downarrow} \\ I_y^{\uparrow,\downarrow} \\ I_z^{\uparrow,\downarrow} \end{pmatrix} = \begin{pmatrix} \cos \theta & 0 & -\sin \theta \\ 0 & 1 & 0 \\ \sin \theta & 0 & \cos \theta \end{pmatrix} \begin{pmatrix} I_X^{\uparrow,\downarrow} \\ I_Y^{\uparrow,\downarrow} \\ I_Z^{\uparrow,\downarrow} \end{pmatrix},$$

where  $\theta$  is the emission angle of the electron.  $I_x^{\uparrow,\downarrow}$ ,  $I_y^{\uparrow,\downarrow}$ , and  $I_z^{\uparrow,\downarrow}$  thus obtained are shown in

Supplementary Figure 1c for  $\theta = -3.5^\circ$  as indicated in Supplementary Figure 1b. Note that for

$y$ -component which is discussed in the main text, the simple relation  $I_y^{\uparrow,\downarrow} = I_Y^{\uparrow,\downarrow}$  holds regardless of  $\theta$ .

## Supplementary References

1. Okuda, T., Miyamoto, K., Miyahara, H., Kuroda, K., Kimura, A. & Namatame, H. Efficient spin resolved spectroscopy observation machine at Hiroshima Synchrotron Radiation Center. *Rev. Sci. Instrum.* **82**, 103302 (2011).
2. Okuda, T., Miyamoto, K., Kimura, A., Namatame, H. & Taniguchi, M. A double VLEED spin detector for high-resolution three dimensional spin vectorial analysis of anisotropic Rashba spin splitting. *J. Electron Spectrosc. Relat. Phenom.* **201**, 23-20 (2015).
